# Supplementary material
Source: PubMed Central journal article supplement (PMC6726939)
Supplement: tpmd190095.SD1.pdf [file tpmd190095.SD1.pdf]

**Supplementary Files:**

**S1 - Table of distribution and gene location of variants identified between various *Leishmania* species**

**S2 - List of all articles referenced in Pubmed that use the ITS-1 PCR-RFLP (Schönian et al. 2003) for the detection and diagnosis of *Leishmania* spp.**

*Note:* Supplementary Files 1 and 2 will be available online in final publication.
